# Supplementary material
Source: Springer Nature journal article supplement (https://www.springermedizin.de/resource/supplementary/12888_2008_520_MOESM2_ESM.pdf/9483488)

# SFW – Length of Involvement

Numbers of Patients

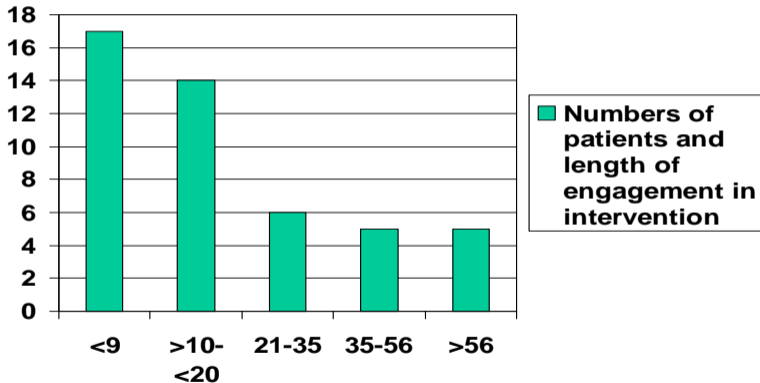

Number of Days Engaged with Acute SFW

Supplement: MOESM2 [file 9483488]
